# Supplementary material for: Diterpenoids from Saliva plebeia R. Br. and Their Antioxidant and Anti-Inflammatory Activities
Source: PubMed Central journal article supplement (PMC6332173; doi:10.3390/molecules200814879), 2015-08-14
Supplement: molecules-20-14879-s001.pdf [file molecules-20-14879-s001.pdf]

# Supplementary Material

## Diterpenoids from *Salvia plebeia* R. Br. and Their Antioxidant and Anti-Inflammatory Activities

### NMR Spectra of Compound 1

Herein, we provide the original UV spectra, IR spectra, 1D and 2D spectra and NMR chemical shifts of Compound 1.

The HR-ESI-MS spectrum see Figure S1, UV spectrum see Figure S2, IR spectrum see Figure S3, <sup>1</sup>H-NMR spectrum see Figures S4, <sup>13</sup>C-NMR see Figure S5, HSQC spectrum see Figure S6, HMBC spectrum see Figure S7, and ROESY see Figure S8.

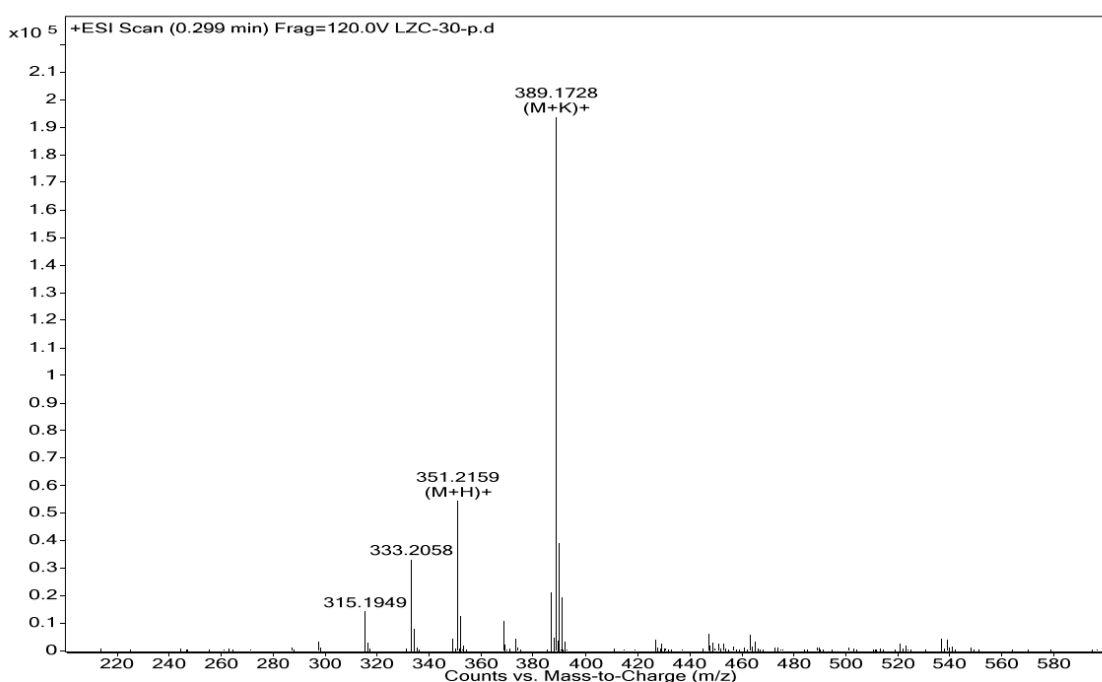

MS Formula Results: + Scan (0.299 min) (LZC-30-p.d)

| m/z      | Ion    | Formula    | Abundance |
|----------|--------|------------|-----------|
| 351.2159 | (M+H)+ | C20 H31 O5 | 54501     |

  

| Best | Formula (M)   | Ion Formula   | Calc m/z | Score | † | Cross Score | Mass     | Calc Mass | Diff (ppm) | Abs Diff (ppm) | Abund Match | Spacing Match | Mass Match | m/z      | DBE  |
|------|---------------|---------------|----------|-------|---|-------------|----------|-----------|------------|----------------|-------------|---------------|------------|----------|------|
| ✓    | C20 H30 O5    | C20 H31 O5    | 351.2166 | 97.92 |   |             | 350.2086 | 350.2093  | 2.05       | 2.05           | 99.35       | 98.49         | 96.78      | 351.2159 | 6    |
|      | C18 H28 N3 O4 | C18 H28 N3 O4 | 351.2153 | 97.54 |   |             | 350.2086 | 350.208   | -1.8       | 1.8            | 97.12       | 98.1          | 97.51      | 351.2159 | 6.5  |
|      | C19 H24 N7    | C19 H25 N7    | 351.2166 | 97.36 |   |             | 350.2086 | 350.2093  | 2.01       | 2.01           | 98.79       | 96.57         | 96.9       | 351.2159 | 11.5 |
|      | C21 H26 N4 O  | C21 H27 N4 O  | 351.2179 | 87.81 |   |             | 350.2086 | 350.2107  | 5.85       | 5.85           | 97.74       | 98.39         | 76.56      | 351.2159 | 11   |
|      | C16 H26 N6 O3 | C16 H27 N6 O3 | 351.2139 | 86.61 |   |             | 350.2086 | 350.2066  | -5.64      | 5.64           | 92.94       | 96.2          | 78.02      | 351.2159 | 7    |
|      | C23 H28 N O2  | C23 H29 N O2  | 351.2193 | 73.59 |   |             | 350.2086 | 350.212   | 9.7        | 9.7            | 95.01       | 98.99         | 48.05      | 351.2159 | 10.5 |
|      | C14 H25 N9 O2 | C14 H25 N9 O2 | 351.2126 | 70.42 |   |             | 350.2086 | 350.2053  | -9.49      | 9.49           | 86.94       | 92.32         | 49.55      | 351.2159 | 7.5  |
|      | C15 H30 N2 O7 | C15 H31 N2 O7 | 351.2126 | 69.7  |   |             | 350.2086 | 350.2053  | -9.45      | 9.45           | 79.4        | 97.7          | 49.88      | 351.2159 | 2    |

  

| m/z      | Ion    | Formula      | Abundance |
|----------|--------|--------------|-----------|
| 389.1728 | (M+K)+ | C20 H30 K O5 | 193627.7  |

  

| Best | Formula (M)   | Ion Formula     | Calc m/z | Score | † | Cross Score | Mass     | Calc Mass | Diff (ppm) | Abs Diff (ppm) | Abund Match | Spacing Match | Mass Match | m/z      | DBE  |
|------|---------------|-----------------|----------|-------|---|-------------|----------|-----------|------------|----------------|-------------|---------------|------------|----------|------|
| ✓    | C20 H30 O5    | C20 H30 K O5    | 389.1725 | 98.59 |   |             | 350.2096 | 350.2093  | -0.75      | 0.75           | 97.81       | 97.5          | 99.6       | 389.1728 | 6    |
|      | C19 H24 N7    | C19 H24 K N7    | 389.1725 | 97.84 |   |             | 350.2096 | 350.2093  | -0.78      | 0.78           | 93.5        | 99.57         | 99.57      | 389.1728 | 11.5 |
|      | C21 H26 N4 O  | C21 H26 K N4 O  | 389.1738 | 93.79 |   |             | 350.2096 | 350.2107  | 3.06       | 3.06           | 89.31       | 99.44         | 93.64      | 389.1728 | 11   |
|      | C18 H28 N3 O4 | C18 H28 K N3 O4 | 389.1711 | 93.13 |   |             | 350.2096 | 350.208   | -4.59      | 4.59           | 99.61       | 99.14         | 86.23      | 389.1728 | 6.5  |
|      | C23 H28 N O2  | C23 H28 K N O2  | 389.1752 | 81.46 |   |             | 350.2096 | 350.212   | 6.9        | 6.9            | 84.18       | 97.94         | 71.58      | 389.1728 | 10.5 |
|      | C16 H26 N6 O3 | C16 H26 K N6 O3 | 389.1698 | 81.04 |   |             | 350.2096 | 350.2066  | -8.44      | 8.44           | 99.79       | 99.29         | 60.66      | 389.1728 | 7    |

Figure S1. HR-ESI-MS spectrum of compound 1.

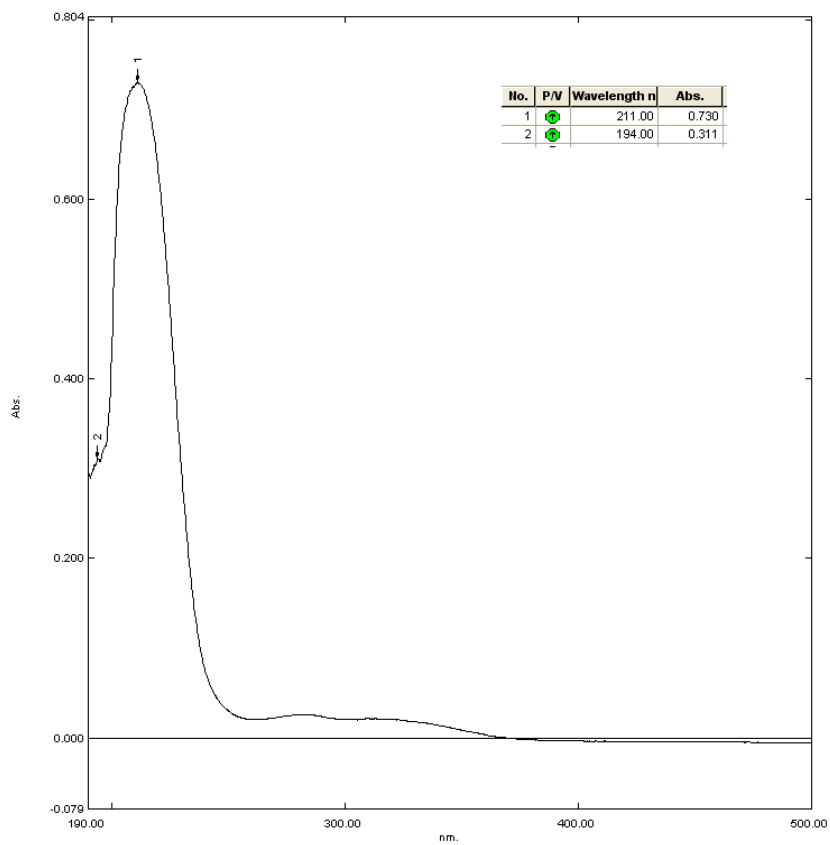

Figure S2. UV spectrum of compound 1.

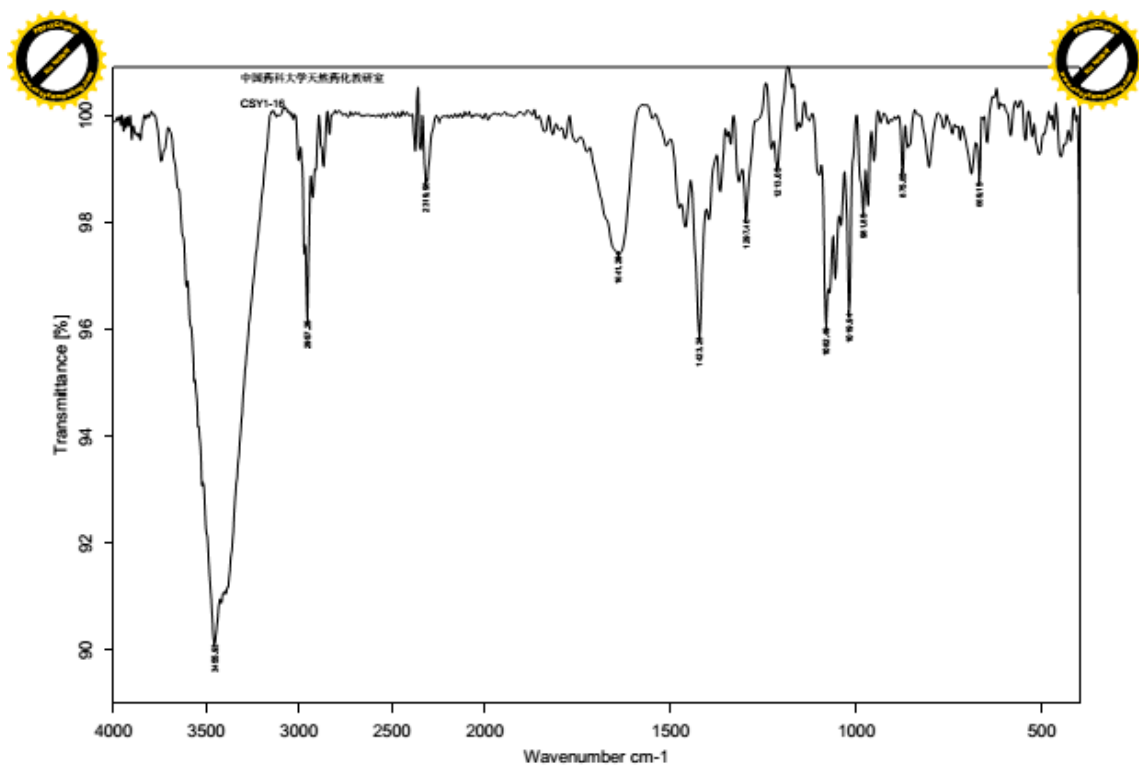

Figure S3. IR spectrum of compound 1.

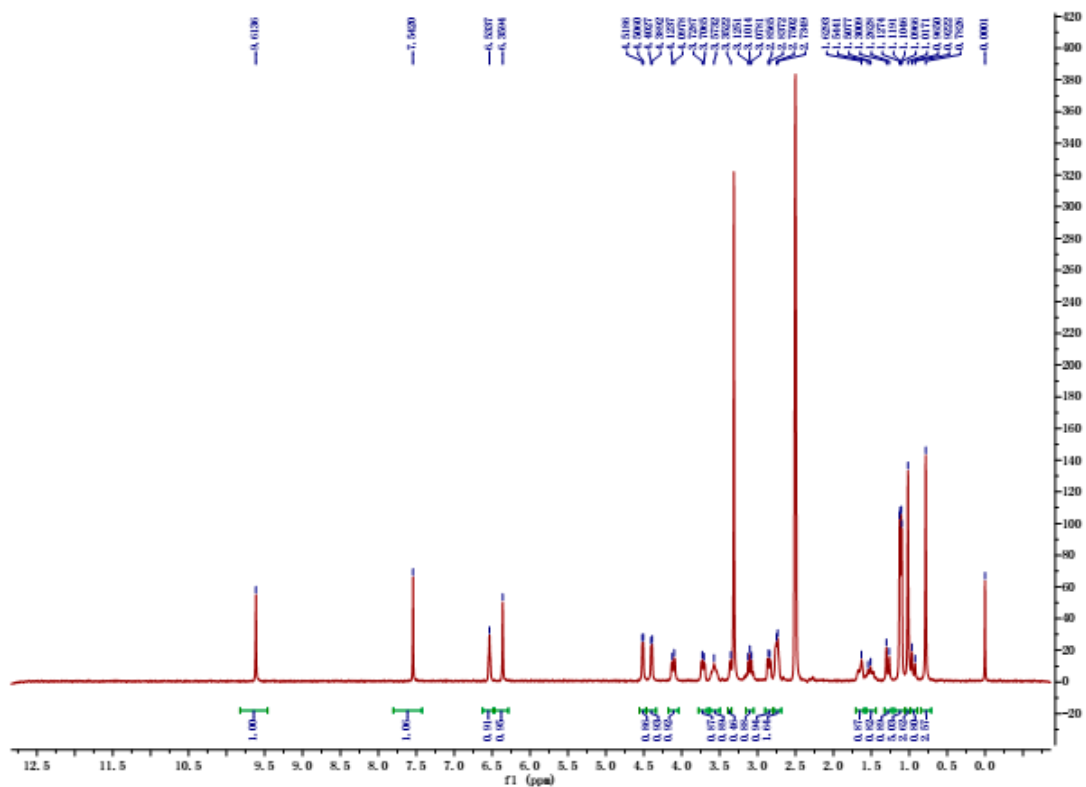

Figure S4.  $^1\text{H}$ -NMR spectrum of compound **1** ( $\text{DMSO-}d_6$ , 300 MHz).

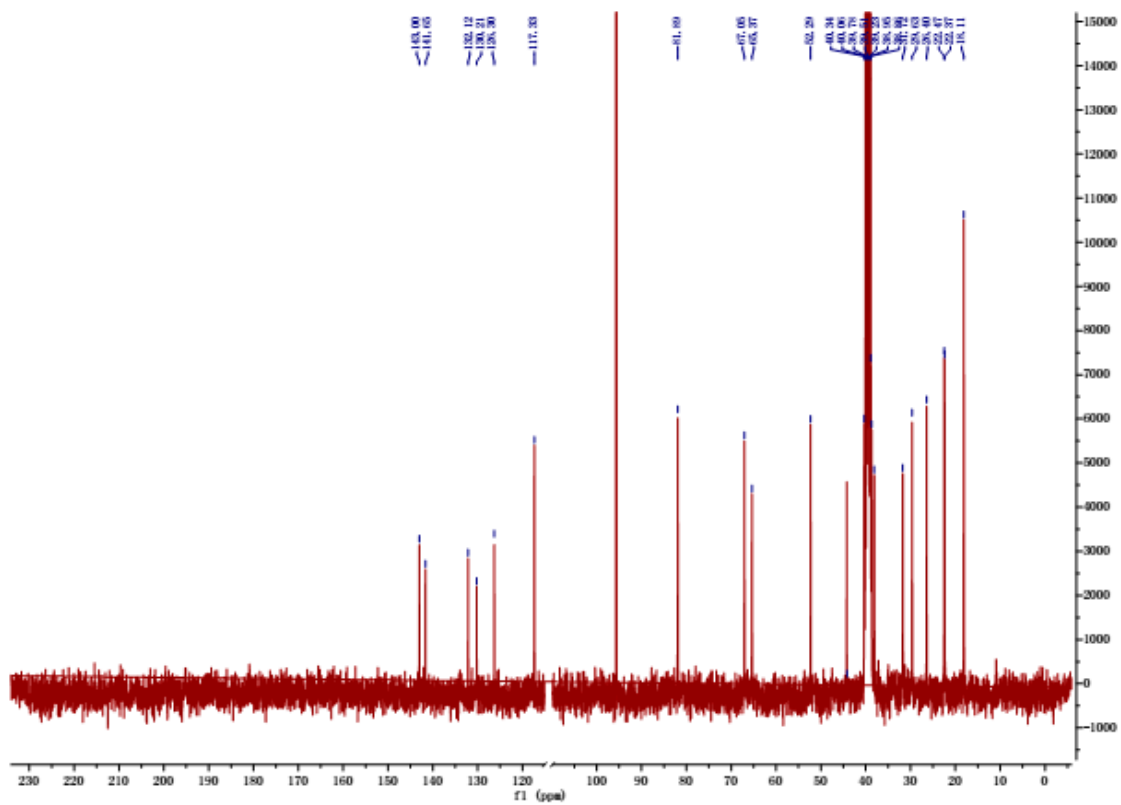

Figure S5.  $^{13}\text{C}$ -NMR spectrum of compound **1** ( $\text{DMSO-}d_6$ , 75 MHz).

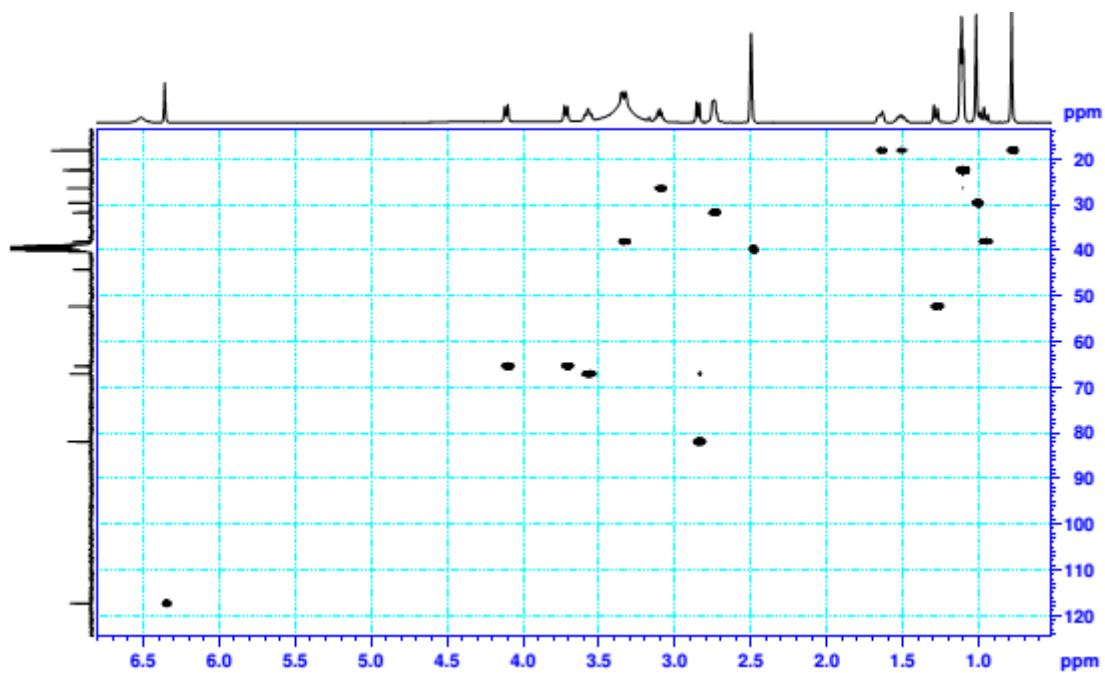

Figure S6. HSQC correlations of compound 1 (DMSO-*d*<sub>6</sub>, 500 MHz).

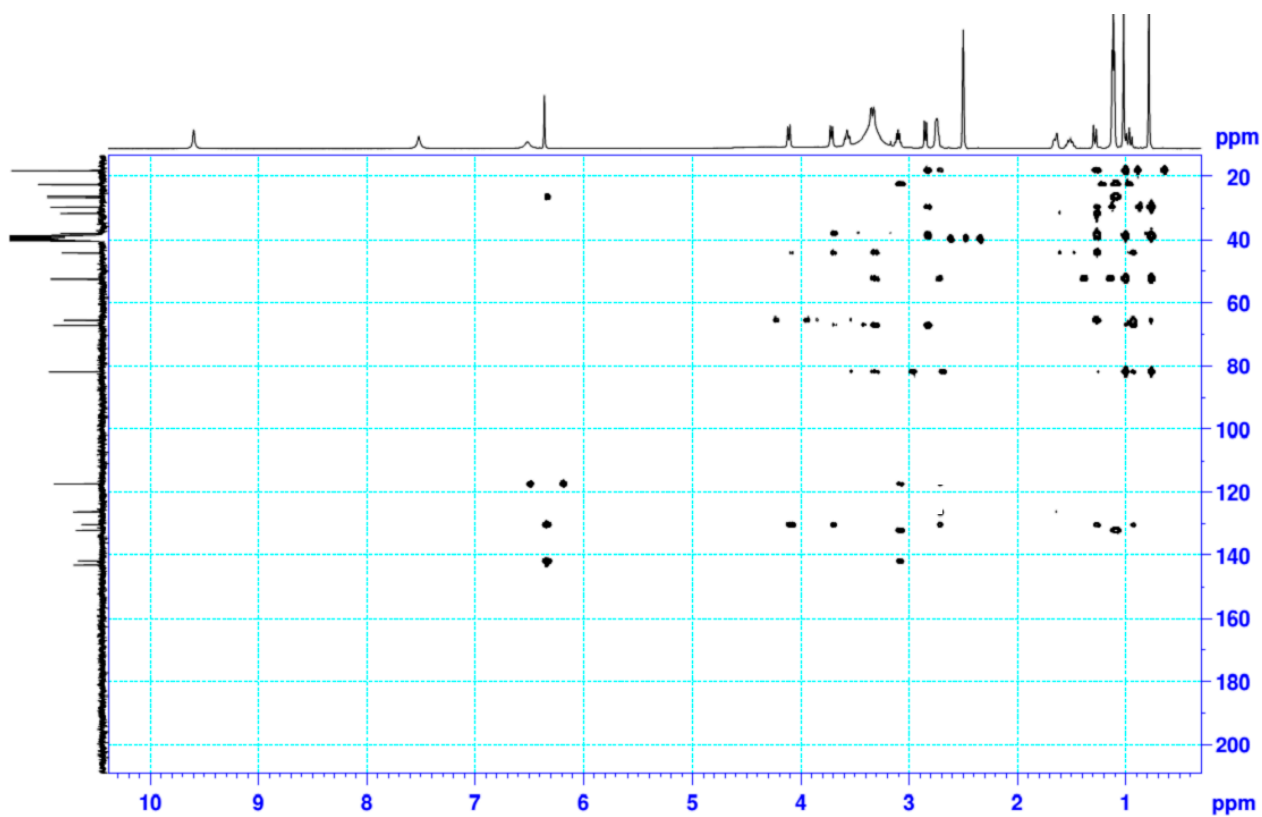

Figure S7. HMBC correlations of compound 1 (DMSO-*d*<sub>6</sub>, 500 MHz).

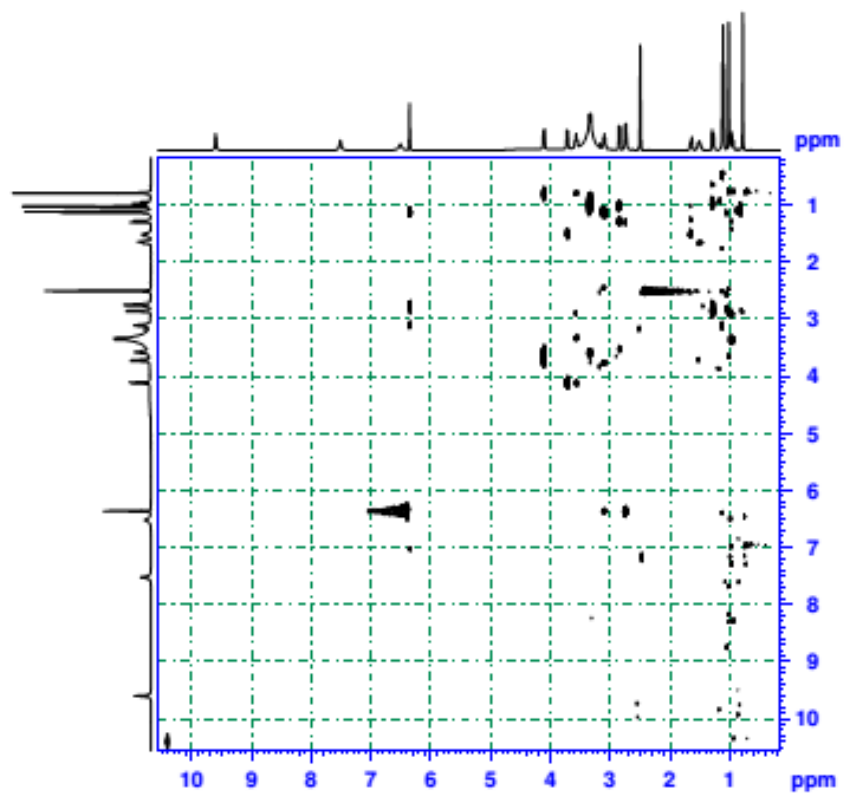

**Figure S8.** ROESY correlations of compound **1** (DMSO-*d*<sub>6</sub>, 500 MHz).
